# Supplementary material for: Canadian SARS-CoV-2 serological survey using antenatal serum samples: a retrospective seroprevalence study
Source: PubMed Central journal article supplement — CMAJ Open. 2023 Apr 4;11(2):E305–13. doi: 10.9778/cmajo.20220045 (PMC10079308; doi:10.9778/cmajo.20220045), 2023-04-04
Supplement: open-2022-0045-original-submission.pdf [file open-2022-0045-original-submission.pdf]

**Title:** Canadian COVID-19 Population Serological Survey Utilizing Antenatal Serum Samples

**Authors:** A Atkinson, MD,<sup>1</sup> A Albert, PhD,<sup>2</sup> E McClymont, PhD,<sup>1,3</sup> J Andrade, BSW,<sup>2</sup> L Beach, PhD,<sup>4</sup> S Bolotin, PhD,<sup>5,6</sup> I Boucoiran, MD,<sup>7</sup> J Bullard, MD,<sup>8</sup> C Charlton, PhD,<sup>9,10</sup> J Crane, MD,<sup>11</sup> G Desnoyers, PhD<sup>12</sup>, S Dougan, MPA, MSc,<sup>13</sup> J-C Forest, MD, PhD,<sup>14</sup> GJ German, MD, PhD,<sup>15,16</sup> Y Giguère, MD,<sup>14</sup> G Girouard, MD,<sup>12</sup> C Hankins, MD, PhD,<sup>17</sup> M Krajden, MD,<sup>18</sup> A Lang, PhD,<sup>19</sup> P Levett, PhD,<sup>18</sup> J Minion, MD,<sup>19</sup> L Murphy-Kaulbeck, MD,<sup>20</sup> C Neudorf, MD,<sup>21</sup> V Poliquin, MD, MSc<sup>22</sup> JL Robinson, PhD,<sup>15</sup> H Scott, MD,<sup>23</sup> V Tran, PhD,<sup>6,16</sup> G Zahariadis, MD,<sup>24</sup> HY Zhou, MD,<sup>9</sup> R Zhuo, PhD,<sup>10</sup> The Antenatal Serostudies Team, and D Money, MD.<sup>1,2</sup>

<sup>1</sup> Department of Obstetrics & Gynecology, University of British Columbia, Vancouver, BC

<sup>2</sup> Women's Health Research Institute, Vancouver, BC

<sup>3</sup> Department of Pediatrics, University of British Columbia, Vancouver, BC

<sup>4</sup> Department of Pathology, Dalhousie University, Halifax, NS

<sup>5</sup> Dalla Lana School of Public Health, University of Toronto, Toronto, ON

<sup>6</sup> Public Health Ontario, Toronto, ON

<sup>7</sup> Department of Obstetrics & Gynecology and School of Public Health, Université de Montréal, Montreal, QC

<sup>8</sup> Department of Medical Microbiology, University of Manitoba, Winnipeg, MB

<sup>9</sup> Department of Laboratory Medicine & Pathology, University of Alberta, Edmonton, AB

<sup>10</sup> Public Health Laboratory (ProvLab), Alberta Precision Laboratories, Edmonton, AB

<sup>11</sup> Department of Obstetrics & Gynecology, Memorial University of Newfoundland, St. John's, NL

<sup>12</sup> Department of Medical Microbiology and Infectious Diseases, Dr. Georges-L.-Dumont University Hospital Centre, Moncton, NB

<sup>13</sup> Better Outcomes Network & Registry Ontario, ON

<sup>14</sup> CHU de Québec-Université Laval Research Center and Departement of Molecular Biology, Medical Biochemistry, and Pathology, Université Laval, Quebec City, QC

<sup>15</sup> Health PEI, Charlottetown, PEI

<sup>16</sup> Department of Laboratory Medicine & Pathobiology, University of Toronto, Toronto, ON

<sup>17</sup> Department of Epidemiology, Biostatistics, and Occupational Health, McGill University, Montreal, QC

<sup>18</sup> Department of Pathology & Laboratory Medicine, University of British Columbia, Vancouver, BC

<sup>19</sup> Department of Pathology & Laboratory Medicine, University of Saskatchewan, Saskatoon, SK

<sup>20</sup> New Brunswick Perinatal Health Program, Fredericton, NB

<sup>21</sup> Department of Community Health & Epidemiology, University of Saskatchewan, Saskatoon, SK

<sup>22</sup> Department of Obstetrics, Gynecology & Reproductive Sciences, University of Manitoba, Winnipeg, MB

<sup>23</sup> Department of Obstetrics & Gynecology, Dalhousie University, Halifax, NS

<sup>24</sup> Department of Laboratory Medicine, Memorial University of Newfoundland, St. John's, NL

*The Antenatal Serostudies Team:* N Antonishyn, M Cameron, K Cassell, E Castillo, D El-Chaar, G Leblanc-Cormier, C Elwood, H Hannah, A Kotaska, K McGrail, A Metcalfe, C Renaud, S Saunders, C Therrien

1  
2  
3 *Corresponding author:* D Money, C425-4500 Oak Street, Vancouver, BC, V6H 3N1. Email:  
4 deborah.money@ubc.ca Telephone: 1-604-875-2194.  
5  
6  
7

8 *Funding statement:* This research was funded by the Public Health Agency of Canada through the  
9 COVID-19 Immunity Task Force. Jean Murray Jones Scholarship to AAtkinson. MSFHR Trainee Award  
10 and CIHR Canadian HIV Trials Network Postdoc to EM. Fond de Recherche du Québec – Santé salary  
11 award to IB.  
12

13 *Declarations of competing interests:*

14 A Atkinson has no conflicts to disclose.

15 A Albert has no conflicts to disclose.

16 E McClymont has no conflicts to disclose.

17 J Andrade has no conflicts to disclose.

18 L Beach has no conflicts to disclose.

19 S Bolotin has no conflicts to disclose.

20 I Boucoiran reports grants/contracts for unrelated work paid to her institution from Pfizer, Altona,  
21 Ferring and GSK

22 J Bullard has no conflicts to disclose.

23 C Charlton has no conflicts to disclose.

24 J Crane has no conflicts to disclose.

25 G Desnoyers has no conflicts to disclose.

26 S Dougan has no conflicts to disclose.

27 J-C Forest has no conflicts to disclose.

28 GJ German has no conflicts to disclose.

29 Y Giguère has no conflicts to disclose.

30 G Girouard has no conflicts to disclose.

31 C Hankins has no conflicts to disclose.

32 M Kraiden reports grants/contracts paid to his institution from Roche/Hologic/Siemens.

33 A Lang has no conflicts to disclose.

34 P Levett has no conflicts to disclose.

35 J Minion has no conflicts to disclose.

36 L Murphy-Kaulbeck has no conflicts to disclose.

37 C Neudorf has no conflicts to disclose.

38 V Poliquin has received unrelated honorarium/consultation fees from GSK and SearchLight Pharma.

39 JL Robinson has no conflicts to disclose.

40 H Scott has no conflicts to disclose.

41 V Tran has no conflicts to disclose.

42 G Zahariadis has unrelated research funded by Genome Atlantic, the Public Health Agency of Canada  
43 and past funding from the Canadian Institute of Health Research.

44 HY Zhou has no conflicts to disclose.

45 R Zhuo has no conflicts to disclose.

46 D Money has received past funding for unrelated work from Merck, GSK, Sanofi, and Novartis.  
47  
48  
49  
50  
51  
52  
53  
54  
55  
56  
57  
58  
59  
60

**Title**

Canadian COVID-19 Population Serological Survey Utilizing Antenatal Serum Samples

**Abstract**

Background: Insufficient data on the rate and distribution of SARS-CoV-2 infection in Canada continues to present a significant challenge to the public health response to the COVID-19 pandemic. Our objective was to assess SARS-CoV-2 seroprevalence in a representative population of reproductive age females throughout Canada, across three waves of infection in 2020.

Methods: This is a Canadian retrospective serological surveillance study utilising existing serological prenatal samples across ten provinces over three time periods: February 3-21 2020, August 24-September 11 2020 and November 16-December 4 2020. Age and postal code administrative data were included to allow comparison with concurrent PCR-positivity rates and regional distribution of SARS-CoV-2 spread.

Results: The seropositivity rates were 1.5 to 10 fold higher than the documented concurrent PCR positive rates in these jurisdictions. Presence of seropositivity as early as February in all jurisdictions reflects the extent of SARS-CoV-2 transmission in the early phases, prior to pandemic declaration.

Interpretation: This study presents one of the largest national Canadian SARS-CoV-2 seroprevalence datasets to date. Its results are more generalizable than many reports owing to the minimally biased nature of sample acquisition (routine prenatal testing). Overall seropositivity was below 6%, indicating widespread vulnerability to SARS-CoV-2 prior to the advent of vaccination in Canada. During the time periods sampled, public health tracking systems in all provinces were underreporting infections by 4 fold on average.

## Introduction

The COVID-19 pandemic has presented great challenges to healthcare systems and policymakers worldwide since its declaration in March 2020 (1). It has been critical that public health networks collaborate to ensure the rapid dissemination of information and data to inform policies, yet obtaining accurate assessments of community spread of SARS-CoV-2 has been difficult from the outset. Initially in Canada, case detection relied on polymerase chain reaction (PCR) assays on specimens obtained via symptomatic testing and contact tracing. Tracking using PCR alone underestimates cases due to missed asymptomatic or mild cases, individuals electing not to be tested, and variable testing capacity (2-6). In other global settings using similar testing criteria, it is estimated that 33-66% of all cases were undetected due to being asymptomatic (2,3). Although various SARS-CoV-2 serosurveillance studies have been performed within Canada, including those involving postal recruitment or utilising residual sera from blood donors and clinical samples, each study has challenges that limit generalisability to the broader Canadian population, particularly in regard to geographic location (7-12). Antenatal sera are collected as part of standard prenatal care across Canada to screen for infections and immunity to viruses such as HIV, rubella, and hepatitis B, or for aneuploidy. In some jurisdictions, antenatal specimens are stored for later use or reference. With a very high uptake among all pregnant persons ranging from 93-96% in Canada (13-15), these sera are highly representative of the greater population of reproductive age and encompass the diversity of Canadian residents by geographic location, socioeconomic status, and race/ethnicity. These samples provide an opportunity to test and assess population seroprevalence among a minimally biased sample throughout the pandemic.

Our objective was to assess SARS-CoV-2 seroprevalence in adults by testing available antenatal serum samples across Canada. To capture progression of the pandemic, three sampling periods were selected for assessment of seroprevalence with comparison to concurrent PCR-positivity rates. This serial, cross-sectional study represents one of the largest antenatal seroprevalence studies of the pandemic to date, and is the first Canadian study to present data from three different time points spanning the first year of the pandemic (16,17).

## 1 **Methods**

### 2 **Sample Selection**

3  
4  
5  
6  
7 As part of a national serological surveillance project, we present data from ten provinces: British Columbia (BC),  
8  
9 Alberta (AB), Saskatchewan (SK), Manitoba (MB), Ontario (ON), Quebec (QC), Newfoundland and Labrador (NL),  
10  
11 Nova Scotia (NS), New Brunswick (NB), and Prince Edward Island (PEI). Where possible, stored antenatal  
12  
13 samples were retrieved from three sampling periods between February 3, 2020 and December 4, 2020; period  
14  
15 A: February 3-21, 2020 prior to the first wave and nationwide restrictions, B: August 24 – September 11, 2020  
16  
17 which corresponds to seroprevalence after the first wave, and C: November 16 – December 4, 2020  
18  
19 corresponding to the second wave of SARS-CoV-2 in Canada. BC, AB, and SK participated in time period A with  
20  
21 the addition of data from NL and NS for time period B. All ten provinces participated in time period C. Of note,  
22  
23 all three time periods pre-dated SARS-CoV-2 vaccine roll out so results uniformly represent response to  
24  
25 infection. Given the relatively continuous flow of samples from pregnant persons, selection of all eligible  
26  
27 samples (e.g. adequate volume and integrity) from a set time period was conducted to provide proportionate  
28  
29 sampling based on population size in each jurisdiction. Antenatal sera are routinely stored for all pregnant  
30  
31 persons in Canada. To reduce bias, participating laboratory sites in all provinces included all samples with  
32  
33 adequate residual sera within the selected time period.  
34  
35  
36  
37  
38

### 39 **Laboratory Assays**

40  
41  
42 Samples were assayed for SARS-CoV-2 antibody by the most sensitive and specific assay platform available in  
43  
44 each reference laboratory in each province with assay sensitivities ranging from 96%-63% (Supplementary Table  
45  
46 1) (18). These included: the OrthoDiagnostics VITROS Total assay (used by BC, SK, ON, NB, and NS), the DiaSorin  
47  
48 LIAISON IgG assay (MB, and QC), the EUROIMMUN assay (used by NL), Abbott assays (used by AB), and the  
49  
50 Roche S Total assay (used by PEI).  
51  
52  
53

### 54 **Statistical Analysis**

55  
56 Sample results from each province were shared with the coordinating centre in Vancouver. Raw seroprevalence  
57  
58  
59  
60

1 was estimated as the number of positive samples over the total, and stratified by age within each province with  
2  
3 exact 95% confidence intervals, except for AB and PEI, where age-linkage was not obtainable. We used the  
4  
5 direct method to age-standardize the seroprevalence within each province using Statistics Canada (StatCan)  
6  
7 data on the proportion of females in each province in each age range. Confidence intervals for the age-  
8  
9 standardized estimates were calculated using the gamma method (19) as implemented in the package dsrTest  
10  
11 (20). All analyses were carried out in R version 4.1.1 (2021-08-10) (21).  
12  
13  
14

### 15 **PCR Confirmed Cases Comparison**

16  
17  
18 The cumulative number of PCR-positive pregnant cases per province was obtained from the Canadian  
19  
20 Surveillance of COVID-19 in Pregnancy: Epidemiology, Maternal and Infant Outcomes (CANCOVID-Preg) project  
21  
22 (22), while the number of cumulative PCR-positive cases for SARS-CoV-2 infection for females aged 20-49 by  
23  
24 region was obtained from StatCan (23). Province-specific data for females aged 20-49 were not available for all  
25  
26 provinces therefore several are combined to represent regions: 1) BC ; 2) Prairies including AB, SK, MB, and the  
27  
28 Northwest Territories (NT); 3) ON and Nunavut (NU); 4) QC; 5) Atlantic including NB, NS, PEI, and NL. To  
29  
30 estimate the PCR-positive rate in each province for 1) the pregnant population, and 2) the population of females  
31  
32 aged 20-49 we used data from StatCan. The number of births in 2020 was used as a proxy for the number of  
33  
34 pregnant people in each province adjusted for the relevant time period to use as a denominator for PCR-positive  
35  
36 rates in pregnancy (24) and the number of females aged 20-49 in each region was used as the denominator for  
37  
38 calculating regional PCR-confirmed-positive result rates among this age-group more generally (23). Both  
39  
40 seroprevalence and PCR rate are presumed to be cumulative for the purposes of comparison for the ten-month  
41  
42 period spanned by this analysis. Rate ratios and confidence intervals of seroprevalence to PCR rates were  
43  
44 calculated using a Chi-square approximation.  
45  
46  
47  
48  
49

### 50 **Ethics Approval**

1 Ethics approval was granted for each site individually to allow for laboratory testing and data transfer to the  
2  
3 central coordination centre of the study. Coordination and data management were established through the  
4  
5 Women's Health Research Institute (WHRI) at BC Women's Hospital and Health Centre (H20-02252).  
6  
7  
8  
9

## 10 **Results**

### 11 **Period A February 3-21 2020**

12  
13  
14  
15 Sampling period A was selected to determine if there was any notable SARS-CoV-2 circulating within the general  
16  
17 population prior to declaration of the COVID-19 pandemic. A total of 7329 antenatal serum samples from BC,  
18  
19 AB, and SK were available for this three-week period. The median age was similar in BC and SK with values of 32  
20  
21 years (range: 15-60) and 30 years (range: 14-41), respectively. The raw seroprevalence in BC was 0.07% (95% CI:  
22  
23 0.01-0.24), in AB was 0.35% (95%CI: 0.19-0.59), and in SK was 0.18% (95% CI: 0.01-1.02), while the age-adjusted  
24  
25 seroprevalence in BC was 0.03% (95% CI: 0.00-0.10), and in SK was 0.19% (95% CI: 0.00-0.71). No formal  
26  
27 reporting of PCR-positive cases occurred during this sampling period.  
28  
29  
30

### 31 **Period B August 24- September 11 2020**

32  
33  
34 Testing of samples from sampling period B was performed to determine the seropositivity rate after the first  
35  
36 wave and to indicate susceptibility for the second wave following natural infection. For sampling period B, BC  
37  
38 and SK retrieved and centrally tested 2427 antenatal samples. Raw seroprevalence was 0.34% (95% CI: 0.12-  
39  
40 0.73) in BC, 1.56% (95% CI: 1.15-2.06) in AB, 0.66% (95% CI: 0.18-1.68) in SK, 0.41% (95% CI: 0.05-1.47) in NS,  
41  
42 and age-adjusted seroprevalence in both BC and SK was 0.29% with confidence intervals 0.07-0.65 and 0.08-  
43  
44 0.63, respectively. NL tested 33 serological samples for this period and detected no confirmed seropositive  
45  
46 samples.  
47  
48  
49  
50

### 51 **Period C November 16 – December 4 2020**

52  
53  
54 This period reflects the weeks just prior to access to COVID-19 vaccines in Canada. Ten provinces (BC, AB, SK,  
55  
56 MB, ON, QC, NL, NS, NB, and PEI) retrieved and tested 14 372 antenatal samples for sampling period C. Age  
57  
58  
59  
60

1 adjusted data were available for eight provinces (BC, SK, MB, ON, QC, NS, NB, and NL) and raw rates only for AB,  
2  
3 and PEI.  
4

### 6 **Raw and Age-Adjusted Seropositivity by Province for Time Period C**

8  
9 With the data available in time period C for all ten provinces, age-adjusted rates and PCR comparisons were  
10 possible by province for all but AB and PEI. Figure 1 demonstrates the range of raw and age-adjusted  
11 seropositivity for this period with the highest rates evident in QC at 5.95% (95% CI 2.66-10.44) and the lowest  
12 rates occurring in NL at 0.24% (95% CI 0.01-0.87).  
13  
14  
15  
16  
17

18 Age-stratified seroprevalences are shown in Figure 2. The figure omits the youngest (<20), and oldest (≥45) age  
19 groups due to low numbers.  
20  
21

22 Comparison over time was possible with BC, AB, and SK data for all three time periods, and with NL and NS for  
23 two time periods, and is reflected in Figure 3, showing increases in seropositivity for time period C.  
24  
25  
26  
27

### 29 **PCR versus Seroprevalence Comparison**

30  
31 The rate of PCR-positive confirmed SARS-CoV-2 infections in pregnant people and the rate of PCR-positive  
32 confirmed SARS-CoV-2 infections in females aged 20-49 by region was compared to the seroprevalence for time  
33 period C. Seroprevalence was higher than PCR-confirmed-positive case rate for all regions and both populations.  
34  
35 In addition, the individual provinces showed higher seroprevalence compared to the regional PCR-positive rate  
36 for all provinces except SK. The seroprevalence was on average 4.3 times higher than the PCR positive rate for  
37 the ten provinces.  
38  
39  
40  
41  
42  
43  
44  
45

### 46 **Geographic Seropositivity Mapping**

47  
48 Figure 4 demonstrates the positive and negative sera results geographically. Positive serum sampling is  
49 demonstrated in remote parts of BC, SK, and MB as well as on the Eastern coast in regions which may have  
50 underestimated the amount of community spread during this time period.  
51  
52  
53  
54  
55  
56  
57  
58  
59  
60



## 1 Interpretation

2  
3  
4 Data from this national serosurveillance study demonstrate several key findings regarding SARS-CoV-2 spread in  
5  
6 Canada. First, SARS-CoV-2 community spread prior to declaration of the pandemic in March 2020 was more  
7  
8 expansive than previously thought (based on PCR-based case detection). During sampling period A, it was  
9  
10 believed that there was no community spread in BC, AB and no infections in SK. Despite this, the age-adjusted  
11  
12 seroprevalence of 0.03% in BC, 0.19% in SK and raw rate of 0.35% in AB, demonstrate early spread through the  
13  
14 general population within these provinces. Following the first wave of infection in Canada, seroprevalence was  
15  
16 slightly elevated but remained fairly low in BC and SK at 0.29%, but had increased to 1.56% in AB. During the  
17  
18 second wave of infection (sampling period C), seroprevalence varied widely across provinces, from 0.24% in NL  
19  
20 to 5.95% in QC. The evolution of the pandemic between provinces and within each province has shown  
21  
22 distinctive differences likely due to varying public health policy and population density. Nonetheless, data from  
23  
24 all provinces demonstrated significant vulnerability to subsequent waves of the pandemic.  
25  
26  
27

28  
29 Prior to this study, Canadian seroprevalence estimates from testing of residual serum by Canadian Blood  
30  
31 Services (CBS) (7,10) showed similar results to ours for sampling period A and B but with some important  
32  
33 differences within sampling period C. CBS samples from November 2020 demonstrated a lower seroprevalence  
34  
35 in ON (3.86% vs 0.77%), NS (1.41% vs 0.19%), and PEI (1.11% vs 0%) but higher seroprevalence in SK (1.81% vs  
36  
37 4.17%) and MB (4.28% vs 8.56%). These discrepancies may reflect the selection bias of healthy blood donors in  
38  
39 the CBS sampling methodology, which may be different to the potential biases inherent in antenatal serum  
40  
41 screening. Although antenatal sera results may reflect variability in fertility rates in certain sub-populations that  
42  
43 can impact generalizability of results, compared to other sampling they cover broad geographies, cultures, and  
44  
45 socioeconomic groups due to high uptake rates of prenatal infection screening (13-15).  
46  
47  
48

49  
50 Our findings also demonstrate important differences when compared to positive SARS-CoV-2 PCR test rates for  
51  
52 the same time periods, with seropositivity rates found to be consistently higher. This is reflected in the results  
53  
54 seen in BC and MB for time period C. We detected an age-adjusted seropositivity rate of 1.87% (95% CI 1.12-  
55  
56  
57  
58  
59  
60

1 2.80) in BC during sampling period C, while the PCR comparison rate among women aged 20-49 years in BC to  
2  
3 December 4, 2020 was 1.13 (95%CI 1.12-1.16). The PCR-positive rate among pregnant women in BC for the  
4  
5 same time period from the CANCOVID-Preg project was 0.62% (95% CI 0.55-0.70). In comparison to the  
6  
7 pregnant PCR-positive test rate, age-adjusted seroprevalence was almost 3 times higher (RR 2.99, 95% CI 2.16-  
8  
9 3.95). In MB, the age-adjusted seroprevalence in our study was 5.62% (95% CI 1.42-12.42), while the rate of  
10  
11 PCR-positive tests in women aged 20-49 in the prairie provinces to December 4, 2020 was 2.11 (95%CI 2.08 –  
12  
13 2.13) giving an estimated rate ratio 2.79 (1.27-4.55). Despite varying provincial PCR testing protocols and  
14  
15 provisions, these findings of higher seroprevalence when compared to PCR rates in nearly all of the provinces  
16  
17 demonstrate an important level of undetected SARS-CoV-2 spread. They also suggest a useful mechanism for  
18  
19 public health monitoring of the pandemic that overcomes the significant cost and variable availability of PCR  
20  
21 testing.  
22  
23  
24

25  
26 This study presents one of the largest serosurveillance studies performed to date on a representative sample of  
27  
28 Canadian reproductive age adults. However, the national nature of this study resulted in the use of varied assays  
29  
30 at regional laboratories across participating provinces. Due to the retrospective nature of sampling, samples  
31  
32 were not available from many provinces for the sampling periods A and B, resulting in a smaller sample size for  
33  
34 these time periods as compared to sampling period C. Additionally, given that waning of SARS-CoV-2 antibodies  
35  
36 remains an area of investigation, a lack of detectable antibody does not necessarily indicate a lack of prior  
37  
38 infection. Seroprevalence was presumed to be cumulative for the purposes of comparison with PCR-confirmed  
39  
40 cases and it is therefore possible, with waning antibody levels, that the percentage of individuals with prior  
41  
42 SARS-CoV-2 infection is higher than our seroprevalence estimates. However, as the only accepted correlate of  
43  
44 immunity is neutralization of viral strain cultures among convalescent patients, the seroprevalence estimates  
45  
46 presented here likely represent the upper limit of individuals who were potentially immune to SARS-CoV-2 prior  
47  
48 to vaccination (25). Of importance, the delay in approvals for doing the assays and sharing the data greatly  
49  
50 limited the public health value of this information to inform real time decisions. This is a concern that has been  
51  
52 echoed by the Pan Canadian Health Data Strategy expert advisory group (26) and highlights how administrative  
53  
54  
55  
56  
57  
58  
59  
60

1 delays in the context of a pandemic need to be improved upon for effective future public health responses in  
2  
3 Canada.  
4

## 5 6 **Conclusion**

7  
8  
9 This national serosurveillance project using minimally-biased antenatal serum samples as a window into the  
10  
11 general population demonstrates more expansive spread of SARS-CoV-2 prior to pandemic declaration than  
12  
13 previously thought. We also document variability in how each province experienced waves of SARS-CoV-2  
14  
15 infection and show that seroprevalence rates were 1.5-10 times greater than reported PCR-positive case rates.  
16  
17 Despite this undetected spread, seroprevalence overall remained low in Canada until the end of 2020 and at a  
18  
19 level suggesting widespread susceptibility to SARS-CoV-2 infection prior to the introduction of vaccination in  
20  
21 2021. Antenatal serosamples represent a highly valuable window into the population health burden of this  
22  
23 pandemic and other infectious diseases of public health significance. In the future, they can be deployed in a  
24  
25 timely and effective manner to inform and guide public health responses.  
26  
27  
28  
29

30 **Acknowledgements:** K Bocking, K Hafizi, M-E Hamelin, F Magee, J Martel, P Murphy, D O'Brien, G Patriquin, J  
31  
32 Perry, T Pidduck, S Plitt, K Rideout, S Taillefer, K Verhaeghe, and F de Wet.  
33  
34  
35  
36  
37  
38  
39  
40  
41  
42  
43  
44  
45  
46  
47  
48  
49  
50  
51  
52  
53  
54  
55  
56  
57  
58  
59  
60

**References:**

1. World Health Organization (WHO). WHO Director- General's opening remarks at the media briefing on COVID-19 – 11 March 2020. 2020. Available <https://www.who.int/director-general/speeches/detail/who-director-general-s-opening-remarks-at-the-media-briefing-on-covid-19---11-march-2020> (accessed 8 August 2021).
2. Oran DP, Topol EJ. The proportion of SARS-CoV-2 Infections that are asymptomatic: A systematic review. *Annals of Int Med* 2021; 174(5):655-662
3. Kalish H, Klump-Thomas C, Hunsberger S, et al. Undiagnosed SARS-CoV-2 seropositivity during the first 6 months of the COVID-19 pandemic in the United States. *Sci Transl Med* 2021;13
4. Vos ERA, den Hartog G, Schepp RM, et al. Nationwide seroprevalence of SARS-CoV-2 and identification of risk factors in the general population of the Netherlands during the first epidemic wave. *J Epidemiol Community Health* 2021;75:489-95
5. Burgess S, Ponsford MJ, Gill D. Are we underestimating seroprevalence of SARS-CoV-2? *Brit Med J* 2020; 370:m3364
6. Ng DL, Goldof Gm, Shy BR, et al. SARS-CoV-2 seroprevalence and neutralizing activity in donor and patient blood. *Nat Community* 2020; 11:4698
7. Saeed S, Drews SJ, Pambrun C, et al. SARS-CoV-2 seroprevalence among blood donors after the first COVID-19 wave in Canada. *Transfusion* 2021; 61:862-72
8. LeBlanc JJ, Gubbay JB, Li Y, et al. Real-Time PCR-based SARS-CoV-2 detection in Canadian Laboratories. *J Clinical Virology* 2020; 128
9. Charlton CL, Nguyen LT, Bailey A, et al. Pre-vaccine positivity of SARS-CoV-2 antibodies in Alberta, Canada during the first two waves of the COVID-19 pandemic. *Microbiol Spectr* 2021; 9:e00291-21

10. Skowronski DM, Sekirov I, Sabaiduc S, et al. Low SARS-CoV-2 sero-prevalence based on anonymized residual sero-survey before and after first wave measures in British Columbia, Canada, March-May 2020. medRxiv 2020.07.13.20153148.
11. Lewin A, Therrien R, De Serres G, Grégoire Y, Perreault J, Drouin M, Fournier MJ, Tremblay T, Beaudoin J, Beaudoin-Bussièrès G, Prévost J, Gendron-Lepage G, Finzi A, Bernier F, Bazin R, Germain M, Delage G. SARS-CoV-2 seroprevalence among blood donors in Québec, and analysis of symptoms associated with seropositivity: a nested case-control study. *Can J Public Health*. 2021 Aug;112(4):576-586. doi: 10.17269/s41997-021-00531-6. Epub 2021 May 17. PMID: 33999398; PMCID: PMC8127462.
12. Tang X, Sharma A, Pasic M, Brown P, Colwill K, Gelband H, Birnboim HC, Nagelkerke N, Bogoch II, Bansal A, Newcombe L, Slater J, Rodriguez PS, Huang G, Fu SH, Meh C, Wu CN, Kaul R, Langlois MA, Morawski E, Hollander A, Eliopoulos D, Aloï B, Lam T, Abe KT, Rathod B, Fazel-Zarandi M, Wang J, Iskilova M, Pasculescu A, Caldwell L, Barrios-Rodiles M, Mohammed-Ali Z, Vas N, Santhanam DR, Cho ER, Qu K, Jha S, Jha V, Suraweera W, Malhotra V, Mastali K, Wen R, Sinha S, Reid A, Gingras AC, Chakraborty P, Slutsky AS, Jha P. SARS-CoV-2 Seroprevalence During the First and Second Pandemic Waves in Canada. *SSRN*. 12 Aug 2021. Doi: <http://dx.doi.org/10.2139/ssrn.3903944>
13. Biondi MJ, Marchand-Austin A, Cronin K, Nanwa N, Ravirajan V, Mandel E, Goneau LW, Mazzulli T, Shah H, Capraru C, Janssen HLA, Sander B, Feld JJ. Prenatal hepatitis B screening, and hepatitis B burden among children, in Ontario: a descriptive study. *CMAJ*. 2020 Oct 26;192(43):E1299-E1305. doi: 10.1503/cmaj.200290.
14. Remis RS, Merid MF, Palmer RW, Whittingham E, King SM, Danson NS, Vernich L, Swantee C, Major C. High uptake of HIV testing in pregnant women in Ontario, Canada. *PLoS One*. 2012;7(11):e48077. doi: 10.1371/journal.pone.0048077. Epub 2012 Nov 9.
15. Plitt SS, Smith TR, Berry W, Osman M, Senthilselvan A, Charlton CL. Examination of a Canadian provincial prenatal HIV screening program: 2010 to 2014. *Can J Public Health*. 2020 Aug;111(4):555-561. doi: 10.17269/s41997-019-00281-6. Epub 2020 Feb 3.

16. Bobrovitz N, Arora RK, Cao C, et al. Global seroprevalence of SARS-CoV-2 antibodies: A systematic review and meta-analysis. *PLoS One*. 2021;16(6):e0252617. Published 2021 Jun 23. doi:10.1371/journal.pone.0252617
17. McAuley A, Gousias P, Hasan T, Rashid L, Richardson C, Reid G, Templeton K, McGuire J, Wise H, McVicar L, Jenks S, Gunn R, Dickson E, Stock SJ, Stockton A, Waugh C, Wood R, McMenemy J, Robertson C, Goldberg DJ, Palmateer NE. National population prevalence of antibodies to SARS-CoV-2 among pregnant women in Scotland during the second wave of the COVID-19 pandemic: a prospective national serosurvey. *Public Health*. 2021 Oct;199:17-19. doi: 10.1016/j.puhe.2021.08.005.
18. Stone M, Grebe E, Sulaeman H, Di Germanio C, Dave H, Kelly K, Biggerstaff B, O.Crews B, Tran N, Jerome KR, Denny TN, Hogema B, Destree M, Jones JM, Thornburg N, Simmons G, Krajden M, Kleinman S, Dumont LJ, Busch MP. Evaluation of commercially available high-throughput SARS-CoV-2 serological assays for surveillance and related applications. *medRxiv* 15 Sept 2021. Doi: 10.1101/2021.09.04.21262414
19. Tiwari RC, Clegg LX, & Zou Z (2006). 'Efficient interval estimation for age-adjusted cancer rates.' *Statistical Methods in Medical Research* 15: 547–569. doi: 10.1177/0962280206070621
20. Michael Nelson (2017). *dsrTest: Tests and Confidence Intervals on Directly Standardized Rates for Several Methods*. R package version 0.2.1. <https://CRAN.R-project.org/package=dsrTest>.
21. R Core Team (2020). *R: A language and environment for statistical computing*. R Foundation for Statistical Computing, Vienna, Austria. <https://www.R-project.org/>.
22. Money D. 2020. Maternal and Infant Outcomes (March 1, 2020 to March 31, 2021) from Five Canadian Provinces Report #4: Released June 3, 2021. Canadian Surveillance of COVID-19 in Pregnancy: Epidemiology, Maternal and Infant Outcomes. Available from: <https://ridprogram.med.ubc.ca/cancovid-preg/>
23. Statistics Canada. Preliminary dataset on confirmed cases of COVID-19, Public Health Agency of Canada, 2020-2021. Issue Number: 2020001. Release date November 12, 2021. Available from: <https://www150.statcan.gc.ca/n1/en/catalogue/132600032020001>
24. Statistics Canada. Table 13-10-0415-01 Live births, by month

1 DOI: <https://doi.org/10.25318/1310041501-eng>

2  
3  
4 25. Khoury, D.S., Cromer, D., Reynaldi, A. et al. Neutralizing antibody levels are highly predictive of immune  
5 protection from symptomatic SARS-CoV-2 infection. *Nat Med* **27**, 1205–1211 (2021).  
6

7  
8  
9 <https://doi.org/10.1038/s41591-021-01377-8>

10  
11 26. Public Health Agency of Canada. Pan Canadian Health Data Strategy. Expert Advisory Group-Report 2.

12  
13 Building Canada's Health Data Foundation. November 2021. Available from URL:

14  
15 [https://www.canada.ca/en/public-health/corporate/mandate/about-agency/external-advisory-bodies/list/pan-](https://www.canada.ca/en/public-health/corporate/mandate/about-agency/external-advisory-bodies/list/pan-canadian-health-data-strategy-reports-summaries/expert-advisory-group-report-02-building-canada-health-data-foundation.html)  
16  
17  
18  
19  
20  
21  
22  
23  
24  
25  
26  
27  
28  
29  
30  
31  
32  
33  
34  
35  
36  
37  
38  
39  
40  
41  
42  
43  
44  
45  
46  
47  
48  
49  
50  
51  
52  
53  
54  
55  
56  
57  
58  
59  
60  
data-foundation.html

Confidential

Figure 1: Raw and age-adjusted seroprevalence by province for Period C. Error bars indicate 95% CI and sample sizes are given below province names.

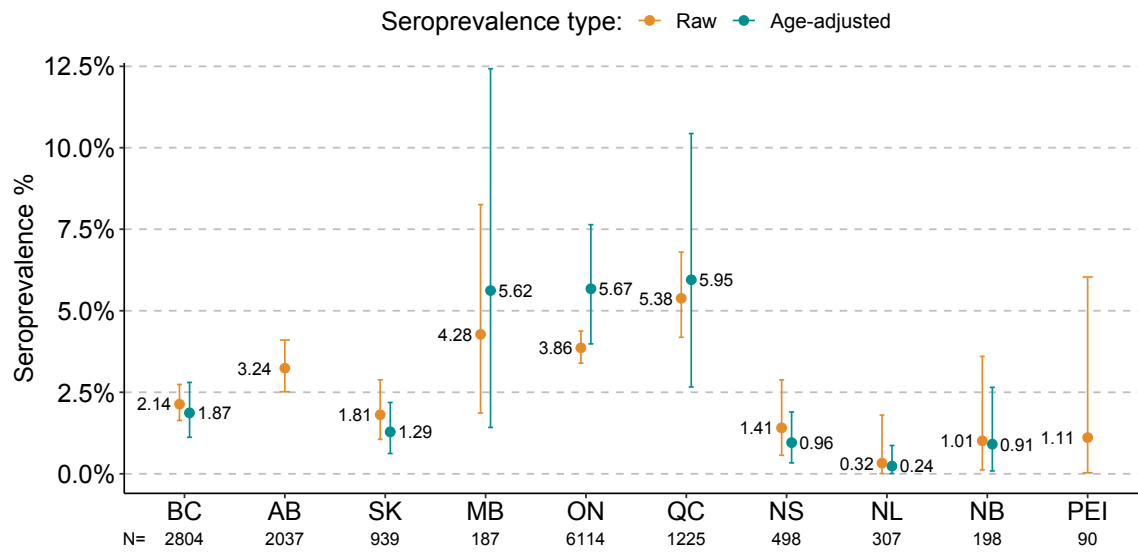

Confidential



**Figure 2: Age-stratified seroprevalence for time period C for each province.** Error bars indicate 95% CI, and those that extend past 20% have been cut off for ease of visual comparison among provinces.

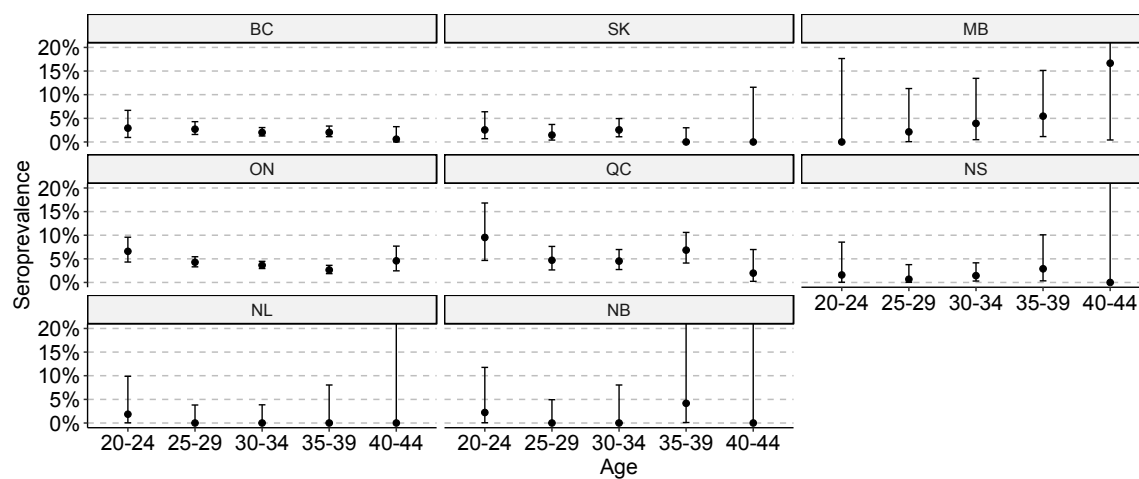

Confidential

1  
2  
3  
4  
5  
6  
7  
8  
9  
10  
11  
12  
13  
14  
15  
16  
17  
18  
19  
20  
21  
22  
23  
24  
25  
26  
27  
28  
29  
30  
31  
32  
33  
34  
35  
36  
37  
38  
39  
40  
41  
42  
43  
44  
45  
46  
47  
48  
49  
50  
51  
52  
53  
54  
55  
56  
57  
58  
59  
60

**Figure 3: Age-adjusted seroprevalence over all three time periods in BC, AB and SK, and two time periods for NS and NL.** The upper confidence interval for NL in August 2020 extends beyond the boundaries of the graph and was truncated for easier visualization of the other provinces.

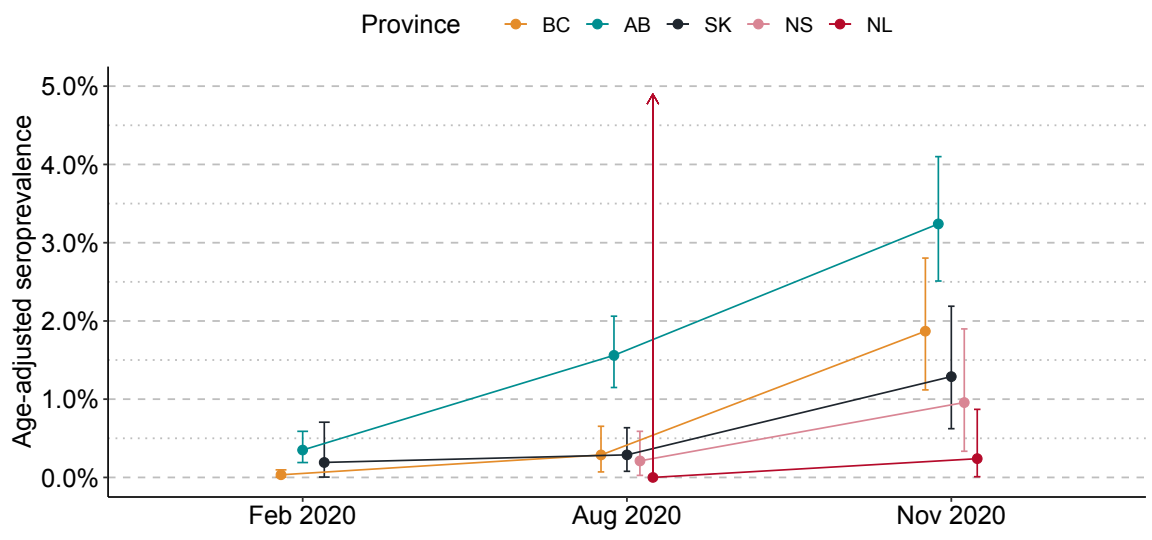

Confidential

1  
2  
3 **Figure 4: Location of positive antenatal serum results for SARS-CoV-2.** Blue cross indicates  
4 seropositive samples and red cross indicates seronegative samples. Regional mapping of samples  
5 was not possible for samples from AB, NL and NB.  
6  
7  
8  
9  
10  
11  
12  
13  
14  
15  
16  
17  
18  
19  
20  
21  
22  
23  
24  
25  
26  
27  
28  
29  
30  
31  
32  
33  
34  
35  
36  
37  
38  
39  
40  
41  
42  
43  
44  
45  
46  
47  
48  
49  
50  
51  
52  
53  
54  
55  
56  
57  
58  
59  
60

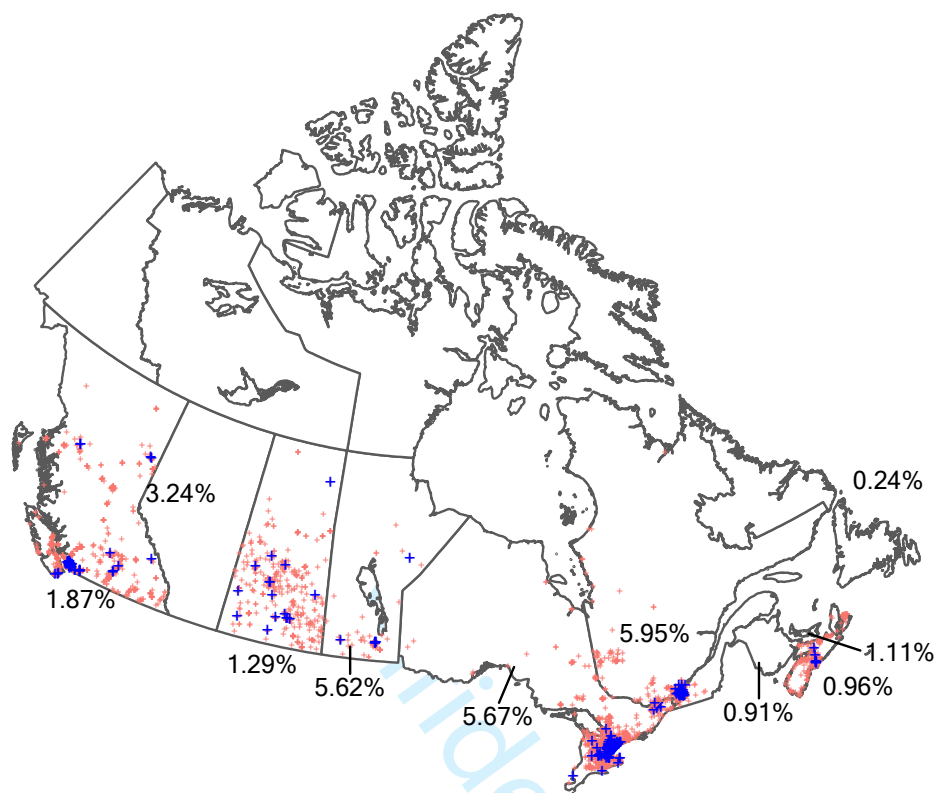

**Table 1: Comparison of PCR-confirmed-positive rates among pregnant people from CANCOVID-Preg, and among females aged 20-49 from StatCan, by region for time period C and results of SARS-CoV-2 sero-screening adjusted for age (November/December 2020). Rate ratios shown for comparison with age-adjusted seroprevalence estimate. Rates for AB and PEI are not age-adjusted. Shown as rates per 100. PCR-positive rates not available for pregnant people in SK.**

| Region | Province | Age-adjusted Seroprevalence (95% CI) | PCR positive rate in pregnant people (95% CI) | Rate ratio (95%CI)     | PCR positive rate in Canadian females aged 20-49 (95% CI) | Rate ratio (95%CI)  |
|--------|----------|--------------------------------------|-----------------------------------------------|------------------------|-----------------------------------------------------------|---------------------|
| 1      | BC       | 1.87 (1.12-2.80)                     | 0.62 (0.55-0.70)                              | 2.99 (2.16-3.95)***    | 1.13 (1.12 - 1.16)                                        | 1.84 (1.37-2.36)*** |
| 2      | AB       | 3.24 (2.51-4.10)                     | 0.86 (0.78-0.95)                              | 3.77 (2.86-4.79)***    | 2.11 (2.08 - 2.13)                                        | 1.54 (1.19-1.92)**  |
| 2      | SK       | 1.29 (0.62-2.19)                     | -                                             | -                      | 2.11 (2.08 - 2.13)                                        | 0.61 (0.30-0.96)    |
| 2      | MB       | 5.62 (1.42-12.42)                    | 1.24 (1.08-1.44)                              | 4.73 (2.13-7.73)***    | 2.11 (2.08 - 2.13)                                        | 2.79 (1.27-4.55)*   |
| 3      | ON       | 5.67 (3.93-7.50)                     | 0.47 (0.43-0.51)                              | 12.07 (10.61-13.69)*** | 1.28 (1.27 - 1.29)                                        | 4.42 (3.97-4.87)*** |
| 4      | QC       | 5.95 (2.66-10.44)                    | 1.01 (0.94-1.08)                              | 5.90 (4.60-7.33)***    | 2.45 (2.42 - 2.47)                                        | 2.43 (1.90-2.99)*** |
| 5      | NS       | 0.96 (0.33-1.90)                     | 0.17 (0.09-0.30)                              | 5.91 (1.28-15.35)**    | 0.11 (0.10 - 0.12)                                        | 8.90 (1.80-17.28)** |
| 5      | NL       | 0.24 (0.01-0.87)                     | 0.00 (0.00-0.13)                              | <sup>-1</sup>          | 0.11 (0.10 - 0.12)                                        | 2.88 (0.00-9.02)    |
| 5      | NB       | 0.91 (0.09-2.65)                     | 0.05 (0.01-0.15)                              | 15.69 (2.64-93.37)*    | 0.11 (0.10 - 0.12)                                        | 8.93 (0.00-22.79)   |

|   |     |                  |                         |              |                       |                       |
|---|-----|------------------|-------------------------|--------------|-----------------------|-----------------------|
| 5 | PEI | 1.11 (0.03-6.04) | 0.00<br>(0.00-<br>0.36) | <sup>1</sup> | 0.11 (0.10<br>- 0.12) | 9.83 (0.00-<br>30.97) |
|---|-----|------------------|-------------------------|--------------|-----------------------|-----------------------|

<sup>1</sup>Rate ratio not possible to calculate

\* indicates p-value <0.01, \*\* indicates p-value <0.001, \*\*\* indicates p-value <0.0001

Confidential

1  
2  
3  
4  
5  
6  
7  
8  
9  
10  
11  
12  
13  
14  
15  
16  
17  
18  
19  
20  
21  
22  
23  
24  
25  
26  
27  
28  
29  
30  
31  
32  
33  
34  
35  
36  
37  
38  
39  
40  
41  
42  
43  
44  
45  
46  
47

**Supplementary Table 1: Assays and their Specifications by Province**

| <b>Province</b>    | <b>Assay</b>                                             | <b>Description of assay<br/>(IgG, IgA, IgM)</b> | <b>Specifications</b> |
|--------------------|----------------------------------------------------------|-------------------------------------------------|-----------------------|
| <b>BC &amp; SK</b> | OrthoDiagnostics VITROS Anti-SARS-CoV-2 Total            | IgG, IgA, IgM                                   | Anti-S                |
| <b>AB</b>          | Abbott Architect SARS-CoV-2 IgG                          | IgG                                             | Anti-N                |
| <b>MB</b>          | DiaSorin LIAISON SARS-CoV-2 S1/S2 IgG                    | IgG                                             | Anti-S                |
| <b>ON</b>          | OrthoDiagnostics VITROS Anti-SARS-CoV-2 Total            | IgG, IgA, IgM                                   | Anti-S                |
| <b>QC</b>          | DiaSorin LIAISON SARS-CoV-2 TrimericS IgG                | IgG                                             | Anti-S                |
| <b>NL</b>          | EUROIMMUN                                                | IgG                                             | Anti-S                |
| <b>NS</b>          | OrthoDiagnostics VITROS Anti-SARS-CoV-2 Total            | IgG, IgA, IgM                                   | Anti-S                |
| <b>PEI</b>         | Roche Diagnostics Elecsys Anti-SARS-CoV-2 Total Antibody | IgG, IgA, IgM                                   | Anti-N                |
| <b>NB</b>          | OrthoDiagnostics VITROS Anti-SARS-CoV-2 Total            | IgG, IgA, IgM                                   | Anti-S                |
